# Supplementary material for: Transcriptional Correlates of Disease Outcome in Anticoagulant-Treated Non-Human Primates Infected with Ebolavirus
Source: PLoS Negl Trop Dis. 2014 Jul 31;8(7):e3061. doi: 10.1371/journal.pntd.0003061 (PMC4117489; doi:10.1371/journal.pntd.0003061)
Supplement: Table S2 — This table lists 241 genes from the general survival-associated transcriptional profile (as described in Materials and Methods ). The table lists the Gene Symbol, Gene Entrez ID, a brief description of the gene name, and a short list of gene functions as described by the Gene Ontology “function” category. (XLS) [file pntd.0003061.s003.xls]

## Sheet: Sheet1
Gene Symbol	GeneID	Description	Function (based on Gene Ontology)
ABCA5	23461	ATP-binding cassette, sub-family A (ABC1), member 5	ATP binding; ATPase activity
AC004112	N/A	Homo sapiens BAC clone CTA-313E3 from 7, complete sequence	N/A
AC009283	N/A	Homo sapiens chromosome 17, clone RP11-390P24, complete sequence	N/A
ACCN1; ASIC2	40	Amiloride-sensitive cation channel 1, neuronal (degenerin)	ion gated channel activity; ligand-gated sodium channel activity; protein binding; voltage-gated sodium channel activity
ACOT7	11332	Acyl-CoA thioesterase 7	fatty-acyl-CoA binding; long-chain fatty acyl-CoA binding; palmitoyl-CoA hydrolase activity; protein binding; protein homodimerization activity
ACP1	52	Acid phosphatase 1, soluble	acid phosphatase activity; non-membrane spanning protein tyrosine phosphatase activity; protein binding
ADH5	128	Alcohol dehydrogenase 5 (class III), chi polypeptide	S-(hydroxymethyl)glutathione dehydrogenase activity; alcohol dehydrogenase (NAD) activity; electron carrier activity; fatty acid binding; formaldehyde dehydrogenase activity; protein homodimerization activity; zinc ion binding
ADM	133	Adrenomedullin	adrenomedullin receptor binding; hormone activity; protein binding; receptor binding
AFAP1L2	84632	Actin filament associated protein 1-like 2	SH2 domain binding; SH3 domain binding; protein tyrosine kinase activator activity
AGAP9	642517	ArfGAP with GTPase domain, ankyrin repeat and PH domain 9	ARF GTPase activator activity; zinc ion binding
AL110505	N/A	Human chromosome 14 DNA sequence BAC R-816J8 of library RPCI-11 from chromosome 14 of Homo sapiens (Human), complete sequence	N/A
AL133412	N/A	Human DNA sequence from clone RP11-78H18 on chromosome 9q22.1-22.33, complete sequence	N/A
AL355615	N/A	Human DNA sequence from clone RP11-33E24 on chromosome 6, complete sequence	N/A
ANP32A	8125	Acidic (leucine-rich) nuclear phosphoprotein 32 family, member A	poly(A) RNA binding; protein binding
APOL6	80830	Apolipoprotein L, 6	lipid binding
APRT	353	Adenine phosphoribosyltransferase	AMP binding; adenine binding; adenine phosphoribosyltransferase activity
ARFRP1	10139	ADP-ribosylation factor related protein 1	GTP binding; GTPase activity; protein binding
ARL4C	10123	ADP-ribosylation factor-like 4C	GTP binding; GTPase activity; alpha-tubulin binding; protein binding
ARL6IP4	51329	ADP-ribosylation-like factor 6 interacting protein 4	poly(A) RNA binding; protein binding
ATP5L	10632	ATP synthase, H+ transporting, mitochondrial F0 complex, subunit G	hydrogen ion transmembrane transporter activity; transmembrane transporter activity
ATP6AP2	10159	ATPase, H+ transporting, lysosomal accessory protein 2	aspartic-type endopeptidase activity; enzyme binding; protein binding; receptor activity
BAK1P2	601	BCL2-antagonist/killer 1 pseudogene 2	N/A
BCL2L1	598	BCL2-like 1	BH3 domain binding; identical protein binding; protein binding; protein heterodimerization activity; protein homodimerization activity; protein kinase binding
BCL3	602	B-cell CLL/lymphoma 3	DNA binding; protein binding; protein binding, bridging; sequence-specific DNA binding transcription factor activity; transcription factor binding
BMP1	649	Bone morphogenetic protein 1	calcium ion binding; cytokine activity; growth factor activity; metalloendopeptidase activity; metallopeptidase activity; peptidase activity; zinc ion binding
BTN3A1	11119	Butyrophilin, subfamily 3, member A1	protein binding
BZW1	9689	Basic leucine zipper and W2 domains 1	poly(A) RNA binding
C14orf73; EXOC3L4	91828	Chromosome 14 open reading frame 73; exocyst complex component 3-like 4	exocytosis
C17orf71; SMG8	55181	Chromosome 17 open reading frame 71; SMG8 nonsense mediated mRNA decay factor	protein binding
C17orf75	64149	Chromosome 17 open reading frame 75	N/A
C1QB	713	Complement component 1, q subcomponent, B chain	protein binding; protein homodimerization activity
C20orf30	29058	Chromosome 20 open reading frame 30	N/A
CASC1	55259	Cancer susceptibility candidate 1	N/A
CASC5	57082	Cancer susceptibility candidate 5	protein binding
CCL8	6355	Chemokine (C-C motif) ligand 8	chemokine activity; heparin binding; phospholipase activator activity; protein kinase activity
CD151	977	CD151 molecule (Raph blood group)	protein binding
CD207	50489	CD207 molecule, langerin	carbohydrate binding; mannose binding
CD27	939	CD27 molecule	cysteine-type endopeptidase inhibitor activity involved in apoptotic process; protein binding; transmembrane signaling receptor activity
CD37	951	CD37 molecule	protein binding
CD99L2	83692	CD99 molecule-like 2	N/A
CDC37	11140	Cell division cycle 37 homolog (S. cerevisiae)	Hsp90 protein binding; chaperone binding; heat shock protein binding; mitogen-activated protein kinase kinase kinase binding; protein binding; protein kinase B binding; unfolded protein binding
CDC42	998	Cell division cycle 42 (GTP binding protein, 25kDa)	GTP binding; GTP-dependent protein binding; GTPase activity; apolipoprotein A-I receptor binding; identical protein binding; mitogen-activated protein kinase kinase kinase binding; protein binding; protein kinase binding; thioesterase binding
CDK2	1017	Cyclin-dependent kinase 2	ATP binding; cyclin binding; cyclin-dependent protein serine/threonine kinase activity; cyclin-dependent protein serine/threonine kinase activity; metal ion binding; protein binding
CEACAM6	4680	carcinoembryonic antigen-related cell adhesion molecule 6 (non-specific cross reacting antigen)	protein binding
CEBPE	1053	CCAAT/enhancer binding protein (C/EBP), epsilon	protein heterodimerization activity; protein homodimerization activity; sequence-specific DNA binding; sequence-specific DNA binding transcription factor activity
CFD	1675	Complement factor D (adipsin)	serine-type endopeptidase activity; serine-type peptidase activity
CLDN3	1365	Claudin 3	identical protein binding; structural molecule activity; transmembrane signaling receptor activity
CNO	55330	Cappuccino homolog (mouse)	protein binding
CREBL2	1389	CAMP responsive element binding protein-like 2	sequence-specific DNA binding; sequence-specific DNA binding transcription factor activity
CRHR2	1395	Corticotropin releasing hormone receptor 2	corticotrophin-releasing factor receptor activity; hormone activity; protein-binding
CST4	1472	Cystatin S	cysteine-type endopeptidase inhibitor activity
CSTF1	1477	Cleavage stimulation factor, 3' pre-RNA, subunit 1, 50kDa	RNA binding; poly(A) RNA binding; protein binding
CTBP2	1488	C-terminal binding protein 2	NAD binding; oxidoreductase activity, acting on the CH-OH group of donors, NAD or NADP as acceptor; protein binding; transcription corepressor activity
CTNNBL1	56259	Catenin, beta like 1	enzyme binding; protein binding
CTSG	1511	Cathepsin G	heparin binding; peptidase activity; serine-type endopeptidase activity
CTSS	1520	Cathepsin S	collagen binding; cysteine-type endopeptidase activity; fibronectin binding; laminin binding; proteoglycan binding
CYTIP	9595	cytohesin 1 interacting protein	protein binding
DAPP1	27071	Dual adaptor of phosphotyrosine and 3-phosphoinositides	phosphatidylinositol-3,4,5-trisphosphate binding; phosphatidylinositol-3,4-bisphosphate binding; phospholipid binding
DENR	8562	Density-regulated protein	protein binding; translation initiation factor activity
DGCR6L	85359	DiGeorge syndrome critical region gene 6-like	N/A
DHX9	1660	DEAH (Asp-Glu-Ala-His) box polypeptide 9	ATP binding; ATP-dependent DNA helicase activity; ATP-dependent RNA helicase activity; DNA binding; RNA helicase activity; RNA polymerase II transcription factor binding; poly(A) RNA binding; protein binding
DNAJC30	84277	DnaJ (Hsp40) homolog, subfamily C, member 30	N/A
DTNB	1838	Dystrobrevin, beta	calcium ion binding; zinc ion binding
DUSP19	142679	Dual specificity phosphatase 19	JUN kinase phosphatase activity; MAP-kinase scaffold activity; mitogen-activated protein kinase kinase kinase binding; protein kinase activator activity; protein kinase inhibitor activity; protein tyrosine phosphatase activity; protein tyrosine/threonine phosphatase activity
EIF2S3	1968	Eukaryotic translation initiation factor 2, subunit 3 gamma, 52kDa	GTP binding; GTPase activity; protein binding; translation factor activity, nucleic acid binding; translation initiation factor activity
EOMES	8320	Eomesodermin homolog (Xenopus laevis)	DNA binding; RNA polymerase II activating transcription factor binding; RNA polymerase II regulatory region sequence-specific DNA binding; RNA polymerase II transcription factor binding transcription factor activity involved in negative regulation of transcription; chromatin binding; sequence-specific DNA binding; sequence-specific DNA binding transcription factor activity
EPB41L3	23136	Erythrocyte membrane protein band 4.1-like 3	actin binding; protein binding; structural constituent of cytoskeleton
FAAH	2166	Fatty acid amide hydrolase	acylglycerol lipase activity; carbon-nitrogen ligase activity, with glutamine as amido-N-donor; fatty acid amide hydrolase activity
FABP5	2171	Fatty acid binding protein 5 (psoriasis-associated)	fatty acid binding; lipid binding; protein binding; transporter activity
FAM128B	80097	Family with sequence similarity 128, member B	protein binding
FAM38A; PEIZO1	9780	Family with sequence similarity 38, member A; piezo-type mechanosensitive ion channel component 1	cation channel activity; mechanically-gated ion channel activity
FAM3C	10447	Family with sequence similarity 3, member C	cytokine activity
FAM63A	55793	Family with sequence similarity 63, member A	N/A
FBXW8	26259	F-box and WD repeat domain containing 8	protein binding
FERMT2	10979	fermitin family member 2	phosphatidylinositol-3,4,5-trisphosphate binding; protein binding
FMO4	2329	Flavin containing monooxygenase 4	N,N-dimethylaniline monooxygenase activity; NADP binding; flavin adenine dinucleotide binding
FOXO3	2309	Forkhead box O3	DNA binding; DNA binding, bending; protein binding; protein kinase binding; sequence-specific DNA binding; sequence-specific DNA binding transcription factor activity
FTCD	10841	Formiminotransferase cyclodeaminase	folic acid binding; formimidoyltetrahydrofolate cyclodeaminase activity; glutamate formimidoyltransferase activity
FTL	2512	Ferritin, light polypeptide	ferric iron binding; identical protein binding; iron ion binding; protein binding
FXYD3	5349	FXYD domain containing ion transport regulator 3	ATPase binding; chloride channel activity
GAGE2A	729447	G antigen 2A	N/A
GAPDHP72	346085	Glyceraldehyde-3-phosphate dehydrogenase pseudogene 72	N/A
GDF6	392255	Growth differentiation factor 6	cytokine activity; growth factor activity; protein homodimerization activity
GNG2	54331	Guanine nucleotide binding protein (G protein), gamma 2	G-protein beta-subunit binding; signal transducer activity
GPKOW	27238	G patch domain and KOW motifs	nucleic acid binding; protein binding
GPR162	27239	G protein-coupled receptor 162	G-protein coupled receptor activity
GRIP1	23426	Glutamate receptor interacting protein 1	androgen receptor binding; beta-catenin binding; protein C-terminus binding; protein binding; receptor signaling complex scaffold activity; transcription coactivator activity
GSTK1	373156	Glutathione S-transferase kappa 1	glutathione peroxidase activity; glutathione transferase activity; protein disulfide oxidoreductase activity; receptor binding
GSTM5	2949	Glutathione S-transferase M5	glutathione transferase activity
H2AFX	3014	H2A histone family, member X	DNA binding; damaged DNA binding; enzyme binding; histone binding; protein binding; protein heterodimerization activity
HAT1	8520	Histone acetyltransferase 1	histone acetyltransferase activity; protein binding
HBA2	3040	Hemoglobin, alpha 2	heme binding; iron ion binding; oxygen binding; oxygen transporter activity; protein binding
HCG18	414777	HLA complex group 18 (non-protein coding)	N/A
HLA-DPB1	3115	Major histocompatibility complex, class II, DP beta 1	N/A
HMP19	51617	HMP19 protein	clathrin light chain binding
HOXC10	3226	Homeobox C10	sequence-specific DNA binding; sequence-specific DNA binding transcription factor activity
HPR	3250	Haptoglobin-related protein	catalytic activity; hemoglobin binding
HPX	3263	Hemopexin	heme transporter activity; metalloendopeptidase activity; protein binding; zinc ion binding
IDH3B	3420	Isocitrate dehydrogenase 3 (NAD+) beta	NAD binding; electron carrier activity; isocitrate dehydrogenase (NAD+) activity; magnesium ion binding
IDO1	3620	indoleamine 2,3-dioxygenase 1	electron carrier activity; heme binding; indoleamine 2,3-dioxygenase activity; metal ion binding; tryptophan 2,3-dioxygenase activity
IDO2	169355	indoleamine 2,3-dioxygenase 2	heme binding; indoleamine 2,3-dioxygenase activity; indoleamine 2,3-dioxygenase activity; metal ion binding; tryptophan 2,3-dioxygenase activity
IFI6	2537	Interferon, alpha-inducible protein 6	protein binding
IGKV2OR2-10	28855	immunoglobulin kappa variable 2/OR2-10 (pseudogene)	N/A
ILF2	3608	Interleukin enhancer binding factor 2, 45kDa	ATP binding; DNA binding; double-stranded RNA binding; poly(A) RNA binding; protein binding; transferase activity
ILF3	3609	Interleukin enhancer binding factor 3, 90kDa	DNA binding; RNA binding; double-stranded RNA binding; poly(A) RNA binding; protein binding
ISG15	9636	ISG15 ubiquitin-like modifier	protein binding; protein tag
ITPA	3704	Inosine triphosphatase (nucleoside triphosphate pyrophosphatase)	ITP diphosphatase activity; XTP diphosphatase activity; dITP diphosphatase activity; metal ion binding; nucleotide binding
KIAA1549	57670	KIAA1549 protein	N/A
KIR2DL1	3802	Killer cell immunoglobulin-like receptor, two domains, long cytoplasmic tail, 1	protein binding; receptor activity
KRT8	3856	Keratin 8	protein binding; protein complex binding; scaffold protein binding; structural molecule activity
LOC100129395	100129395	NS5ATP13TP1	N/A
LOC100287723	100287723	Ig kappa chain V-I region Walker-like	N/A
LOC100289371	100289371	Mitochondrially Encoded Cytochrome C Oxidase III Pseudogene	N/A
LOC100289874	100289874	40S ribosomal protein SA-like	N/A
LOC100292959	100292959	similar to hCG2042049	N/A
LOC100293289	100293289	hypothetical protein LOC100293289	N/A
LOC100293324	100293324	similar to hCG2042717	N/A
LOC100293559	100293559	similar to hCG1812074	N/A
LOC100293709	100293709	hypothetical protein LOC100293709	N/A
LOC100613771	100613771	Ig heavy chain V-III region VH26-like	N/A
LOC144571	144571	Hypothetical protein LOC144571	N/A
LOC390736	390736	similar to Spermatogenesis associated protein 2 (Spermatogenesis associated protein PD1)	N/A
LOC440871	440871	similar to Hcg2043206	N/A
LOC442207	442207	LOC442207	N/A
LOC457260	457260	histone H2B type 2-F-like	N/A
LOC459554	459554	Ig kappa chain V-II region RPMI 6410-like	N/A
LOC652493	652493	ig kappa chain V-I region HK102-like	N/A
LOC728914	728914	Similar to H3 histone, family 3B	N/A
LOC749743	749743	uncharacterized LOC749743	N/A
LTF	4057	Lactotransferrin	DNA binding; ferric iron binding; heparin binding; iron ion binding; protein binding; protein serine/threonine kinase activator activity; serine-type endopeptidase activity
MAL2	114569	Mal, T-cell differentiation protein 2	protein binding
MAPK8	5599	Mitogen-activated protein kinase 8	ATP binding; JUN kinase activity; histone deacetylase binding; histone deacetylase regulator activity; protein binding; protein serine/threonine kinase activity
MBTPS1	8720	Membrane-bound transcription factor peptidase, site 1	serine-type endopeptidase activity; serine-type endopeptidase activity
MDH2	4191	Malate dehydrogenase 2, NAD (mitochondrial)	L-malate dehydrogenase activity; L-malate dehydrogenase activity; L-malate dehydrogenase activity; malate dehydrogenase (NADP+) activity; poly(A) RNA binding; protein self-association
MEF2A	4205	Myocyte enhancer factor 2A	RNA polymerase II core promoter proximal region sequence-specific DNA binding transcription factor activity involved in positive regulation of transcription; RNA polymerase II distal enhancer sequence-specific DNA binding transcription factor activity; RNA polymerase II regulatory region sequence-specific DNA binding; RNA polymerase II transcription coactivator activity; RNA polymerase II transcr…
MFN2	9927	Mitofusin 2	GTP binding; GTPase activity; protein binding; ubiquitin protein ligase binding
MGST1	4257	Microsomal glutathione S-transferase 1	glutathione binding; glutathione peroxidase activity; glutathione transferase activity; protein binding; protein homodimerization activity
MICAL3	57553	Microtubule associated monoxygenase, calponin and LIM domain containing 3	FAD binding; actin binding; oxidoreductase activity, acting on paired donors, with incorporation or reduction of molecular oxygen, NAD(P)H as one donor, and incorporation of one atom of oxygen; zinc ion binding
MINPP1	9562	Multiple inositol polyphosphate histidine phosphatase, 1	acid phosphatase activity; bisphosphoglycerate 3-phosphatase activity; inositol hexakisphosphate 2-phosphatase activity; phosphohistidine phosphatase activity
MLLT1	4298	Myeloid/lymphoid or mixed-lineage leukemia (trithorax homolog, Drosophila); translocated to, 1	DNA binding; protein binding
MLST8	64223	MTOR associated protein, LST8 homolog (S. cerevisiae)	protein binding
MPZL1	9019	Myelin protein zero-like 1	protein binding; structural molecule activity
MRPS10	55173	Mitochondrial ribosomal protein S10	N/A
MRPS18B	28973	Mitochondrial ribosomal protein S18B	structural constituent of ribosome
MRPS24	64951	mitochondrial ribosomal protein S24	poly(A) RNA binding; structural constituent of ribosome
MRPS27	23107	Mitochondrial ribosomal protein S27	protein binding
MSL3	10943	male-specific lethal 3 homolog (Drosophila)	DNA binding; methylated histone residue binding; sequence-specific DNA binding transcription factor activity
MT1F	4494	Metallothionein 1F	zinc ion binding
MVK	4598	Mevalonate kinase (mevalonic aciduria)	ATP binding; identical protein binding; mevalonate kinase activity; mevalonate kinase activity; mevalonate kinase activity
MYL6	4637	Myosin, light chain 6, alkali, smooth muscle and non-muscle	actin-dependent ATPase activity; calcium ion binding; motor activity; protein binding; structural constituent of muscle
NDUFA12	55967	NADH dehydrogenase (ubiquinone) 1 alpha subcomplex, 12	NADH dehydrogenase (ubiquinone) activity; electron carrier activity
NDUFAF1	51103	NADH dehydrogenase (ubiquinone) 1 alpha subcomplex, assembly factor 1	protein binding; unfolded protein binding
NDUFS2	4720	NADH dehydrogenase (ubiquinone) Fe-S protein 2, 49kDa (NADH-coenzyme Q reductase)	4 iron, 4 sulfur cluster binding; NAD binding; NADH dehydrogenase (ubiquinone) activity; electron carrier activity; metal ion binding; protein binding; quinone binding
NEB	4703	Nebulin	actin binding; protein binding; structural constituent of muscle
NETO1	81832	Neuropilin (NRP) and tolloid (TLL)-like 1	N/A
NFKBIL2	4796	Nuclear factor of kappa light polypeptide gene enhancer in B-cells inhibitor-like 2	histone binding; protein binding; transcription corepressor activity
NKTR	4820	Natural killer-tumor recognition sequence	cyclosporin A binding; peptidyl-prolyl cis-trans isomerase activity
NSUN2	54888	NOL1/NOP2/Sun domain family, member 2	poly(A) RNA binding; tRNA (cytosine-5-)-methyltransferase activity; tRNA binding
NUDT1	4521	Nudix (nucleoside diphosphate linked moiety X)-type motif 1	8-oxo-7,8-dihydrodeoxyguanosine triphosphate pyrophosphatase activity; 8-oxo-7,8-dihydroguanosine triphosphate pyrophosphatase activity; ATP diphosphatase activity; GTPase activity; NOT m7G(5')pppN diphosphatase activity; metal ion binding; snoRNA binding
NUP88	4927	Nucleoporin 88kDa	transporter activity
ODF3B	440836	outer dense fiber of sperm tails 3B	N/A
OSGIN2	734	Oxidative stress induced growth inhibitor family member 2	N/A
OSTBETA	123264	Organic solute transporter beta	protein heterodimerization activity; transporter activity
PAGE2B	389860	P antigen family, member 2B	N/A
PCNA	5111	Proliferating cell nuclear antigen	DNA polymerase binding; DNA polymerase processivity factor activity; MutLalpha complex binding; dinucleotide insertion or deletion binding; identical protein binding; protein binding; purine-specific mismatch base pair DNA N-glycosylase activity; receptor tyrosine kinase binding
PDCD10	11235	Programmed cell death 10	protein N-terminus binding; protein binding; protein homodimerization activity
PDLIM2	64236	PDZ and LIM domain 2 (mystique)	filamin binding; muscle alpha-actinin binding; myosin heavy chain binding; zinc ion binding
PECAM1	5175	Platelet/endothelial cell adhesion molecule (CD31 antigen)	protein binding
PLTP	5360	Phospholipid transfer protein	lipid binding
POLD2	5425	Polymerase (DNA directed), delta 2, regulatory subunit 50kDa	DNA binding; DNA-directed DNA polymerase activity; protein binding
POLD4	57804	Polymerase (DNA-directed), delta 4	DNA-directed DNA polymerase activity; protein binding
POLK	51426	Polymerase (DNA directed) kappa	DNA-directed DNA polymerase activity; damaged DNA binding; metal ion binding
PPIAP16	5488	peptidylprolyl isomerase A (cyclophilin A) pseudogene 16	N/A
PPIC	5480	Peptidylprolyl isomerase C (cyclophilin C)	cyclosporin A binding; peptidyl-prolyl cis-trans isomerase activity; unfolded protein binding
PRDX2	7001	Peroxiredoxin 2	antioxidant activity; antioxidant activity; thioredoxin peroxidase activity; thioredoxin peroxidase activity
PRF1	5551	Perforin 1 (pore forming protein)	calcium ion binding; protein binding; wide pore channel activity
PSMA1	5682	Proteasome (prosome, macropain) subunit, alpha type, 1	RNA binding; protein binding; threonine-type endopeptidase activity
PTGDR	5729	Prostaglandin D2 receptor (DP)	prostaglandin D receptor activity; prostaglandin J receptor activity; protein binding
PTGS1	5742	Prostaglandin-endoperoxide synthase 1 (prostaglandin G/H synthase and cyclooxygenase)	dioxygenase activity; heme binding; metal ion binding; peroxidase activity; prostaglandin-endoperoxide synthase activity; prostaglandin-endoperoxide synthase activity
RAN	5901	RAN, member RAS oncogene family	GTP binding; GTPase activity; androgen receptor binding; chromatin binding; poly(A) RNA binding; protein binding; protein domain specific binding; transcription coactivator activity
RASA4	10156	RAS p21 protein activator 4	GTPase activator activity; Ras GTPase activator activity; metal ion binding
RASGEF1B	153020	RasGEF domain family, member 1B	Ras guanyl-nucleotide exchange factor activity
RCHY1	25898	Ring finger and CHY zinc finger domain containing 1	p53 binding; protein binding; protein homodimerization activity; receptor binding; ubiquitin-protein ligase activity; zinc ion binding
REEP4	80346	Receptor accessory protein 4	microtubule binding
RNF128	79589	Ring finger protein 128	ubiquitin-protein ligase activity; zinc ion binding
ROGDI	79641	Rogdi homolog (Drosophila)	N/A
RP1	6101	Retinitis pigmentosa 1 (autosomal dominant)	microtubule binding; protein binding
RPL10	6134	Ribosomal protein L10	poly(A) RNA binding; protein binding; structural constituent of ribosome; structural constituent of ribosome
RPL32P3	132241	Ribosomal protein L32 pseudogene 3	N/A
RPS15AP38	100271655	ribosomal protein S15a pseudogene 38	N/A
RPSA	3921	Ribosomal protein SA	laminin binding; laminin receptor activity; poly(A) RNA binding; protein binding; ribosome binding; structural constituent of ribosome
RPSAP56	645656	ribosomal protein SA pseudogene 56	N/A
RRP7B	91695	ribosomal RNA processing 7 homolog B (S. cerevisiae)	N/A
S100A9	6280	S100 calcium binding protein A9	RAGE receptor binding; Toll-like receptor 4 binding; antioxidant activity; arachidonic acid binding; calcium ion binding; microtubule binding; protein binding; signal transducer activity; zinc ion binding
SATB2	23314	SATB homeobox 2	chromatin binding; protein binding; sequence-specific DNA binding; sequence-specific DNA binding transcription factor activity
SCN1B	6324	Sodium channel, voltage-gated, type I, beta	sodium channel inhibitor activity; sodium channel regulator activity; voltage-gated sodium channel activity; voltage-gated sodium channel activity involved in Purkinje myocyte action potential; voltage-gated sodium channel activity involved in cardiac muscle cell action potential
SDHC	6391	Succinate dehydrogenase complex, subunit C, integral membrane protein, 15kDa	electron carrier activity; heme binding; metal ion binding; succinate dehydrogenase activity
SEPHS2	22928	Selenophosphate synthetase 2	ATP binding; selenide, water dikinase activity
SERPINB9	5272	Serpin peptidase inhibitor, clade B (ovalbumin), member 9	cysteine-type endopeptidase inhibitor activity involved in apoptotic process; cysteine-type endopeptidase inhibitor activity involved in apoptotic process; protease binding; protein binding; serine-type endopeptidase inhibitor activity
SFRS11	9295	Splicing factor, arginine/serine-rich 11	nucleotide binding; poly(A) RNA binding; protein binding
SGCB	6443	Sarcoglycan, beta (43kDa dystrophin-associated glycoprotein)	N/A
SHMT1	6470	Serine hydroxymethyltransferase 1 (soluble)	L-allo-threonine aldolase activity; amino acid binding; glycine hydroxymethyltransferase activity; glycine hydroxymethyltransferase activity; protein homodimerization activity; pyridoxal phosphate binding
SLC38A5	92745	Solute carrier family 38, member 5	glycine transmembrane transporter activity
SLC9A7	84679	Solute carrier family 9 (sodium/hydrogen exchanger), member 7	potassium:hydrogen antiporter activity; protein binding; protein homodimerization activity; sodium:hydrogen antiporter activity
SNORA67	26781	small nucleolar RNA, H/ACA box 67	N/A
SNORD60	26788	small nucleolar RNA, C/D box 60	N/A
SNX10	29887	Sorting nexin 10	1-phosphatidylinositol binding; ATPase binding
SPINT2	10653	Serine peptidase inhibitor, Kunitz type, 2	endopeptidase inhibitor activity; serine-type endopeptidase inhibitor activity
SSR4	6748	Signal sequence receptor, delta (translocon-associated protein delta)	SRP-dependent cotranslational protein targeting to membrane; cellular protein metabolic process; gene expression; translation
SULT1A2	6799	Sulfotransferase family, cytosolic, 1A, phenol-preferring, member 2	aryl sulfotransferase activity; flavonol 3-sulfotransferase activity; sulfotransferase activity
SYTL2	54843	Synaptotagmin-like 2	Rab GTPase binding; neurexin family protein binding; phosphatase binding; phosphatidylinositol-4,5-bisphosphate binding; phosphatidylserine binding; protein binding
TAF7	6879	TAF7 RNA polymerase II, TATA box binding protein (TBP)-associated factor, 55kDa	histone acetyltransferase binding; protein binding; thyroid hormone receptor binding; transcription coactivator activity; transcription factor binding; transcription regulatory region DNA binding; vitamin D receptor binding
TBC1D15	64786	TBC1 domain family, member 15	Rab GTPase activator activity; protein binding
TGFBI	7045	Transforming growth factor, beta-induced, 68kDa	extracellular matrix binding; integrin binding
TM9SF4	9777	Transmembrane 9 superfamily protein member 4	N/A
TMEM189-UBE2V1	387522	TMEM189-UBE2V1 readthrough	N/A
TMEM40	55287	Transmembrane protein 40	N/A
TMEM71	137835	Transmembrane protein 71	N/A
TMEM86A	144110	Transmembrane protein 86A	N/A
TNFRSF13B	23495	Tumor necrosis factor receptor superfamily, member 13B	protein binding; receptor activity
TNRC6A	27327	Trinucleotide repeat containing 6A	nucleotide binding; poly(A) RNA binding; protein binding
TPD52L2	7165	Tumor protein D52-like 2	poly(A) RNA binding; protein binding; protein heterodimerization activity; protein homodimerization activity
TRA@	6955	T cell receptor alpha locus	N/A
TRABD	80305	TraB domain containing	N/A
TRIM27	5987	Tripartite motif-containing 27	DNA binding; metal ion binding; nucleic acid binding; protein binding; transmembrane receptor protein tyrosine kinase activity; ubiquitin-protein ligase activity; zinc ion binding
tRNA-Tyr-TAC_1	N/A	N/A	N/A
TSFM	10102	Ts translation elongation factor, mitochondrial	poly(A) RNA binding; translation elongation factor activity
TTK	7272	TTK protein kinase	ATP binding; protein binding; protein serine/threonine kinase activity; protein serine/threonine/tyrosine kinase activity; protein tyrosine kinase activity
TXNDC5	81567	Thioredoxin domain containing 5	protein binding; protein disulfide isomerase activity; protein disulfide oxidoreductase activity
TYRP1	7306	Tyrosinase-related protein 1	copper ion binding; oxidoreductase activity, acting on paired donors, with incorporation or reduction of molecular oxygen, another compound as one donor, and incorporation of one atom of oxygen; protein binding; protein heterodimerization activity; protein homodimerization activity
UBE1DC1; UBA5	79876	ubiquitin-like modifier activating enzyme 5	ATP binding; UFM1 activating enzyme activity; cofactor binding; metal ion binding; oxidoreductase activity, acting on the CH-OH group of donors, NAD or NADP as acceptor; protein binding
UBE2O	63893	Ubiquitin-conjugating enzyme E2O	ATP binding; poly(A) RNA binding; protein binding; ubiquitin-protein ligase activity
UNC93B1	81622	Unc-93 homolog B1 (C. elegans)	defense response to virus; innate immune response; intracellular protein transport; toll-like receptor 3 signaling pathway; toll-like receptor 7 signaling pathway; toll-like receptor 9 signaling pathway; toll-like receptor signaling pathway
USE1	55850	Unconventional SNARE in the ER 1 homolog (S. cerevisiae)	NOT ER to Golgi vesicle-mediated transport; endoplasmic reticulum tubular network organization; lysosomal transport; protein catabolic process; protein transport; regulation of ER to Golgi vesicle-mediated transport; secretion by cell
UTS2	10911	Urotensin 2	hormone activity; receptor binding
VSIG10L	147645	V-set and immunoglobulin domain containing 10 like	N/A
ZBTB32	27033	Zinc finger and BTB domain containing 32	DNA binding; protein binding; transcription corepressor activity; zinc ion binding
ZNF259	8882	Zinc finger protein 259	protein binding; translation initiation factor binding; zinc ion binding
ZNF346	23567	Zinc finger protein 346	double-stranded RNA binding; poly(A) RNA binding; protein binding; zinc ion binding
ZNF43	7594	Zinc finger protein 43	DNA binding; metal ion binding; sequence-specific DNA binding transcription factor activity
ZSWIM1	90204	Zinc finger, SWIM-type containing 1	zinc ion binding
